# Supplementary material
Source: publisher figshare collection journal article supplement (https://springernature.figshare.com/ndownloader/files/16354862)
Supplement: Supplementary file [file 16354862]

**Table S5.** The *BD* proteins between PDAC Good-responders and Limited-responders are involved in the coagulation and complement cascades, and glycolysis/gluconeogenesis indicated by the KEGG pathway analysis.

| Pathways                            | Proteins                                                                                                                                                                                                                            | P-value  |
|-------------------------------------|-------------------------------------------------------------------------------------------------------------------------------------------------------------------------------------------------------------------------------------|----------|
| complement and coagulation cascades | Prothrombin, Complement component C9, Complement component C8 alpha chain, Complement component C8 beta chain, Complement C1r subcomponent, C4b-binding protein beta chain, Plasma serine protease inhibitor, von Willebrand factor | 3.32E-10 |
| glycolysis/gluconeogenesis          | Fructose-bisphosphate aldolase A, L-lactate dehydrogenase C chain, L-lactate dehydrogenase A-like 6A, L-lactate dehydrogenase A chain, L-lactate dehydrogenase B chain                                                              | 2.80E-05 |
